# Supplementary material for: A generalized spatial autoregressive neural network (GSARNN) method for three-dimensional spatial interpolation
Source: Copernicus journal article supplement (doi:10.5194/gmd-2022-198), 2022-09-19
Supplement: Supplementary file [file gmd-2022-198-AC3-supplement.pdf]

Dear Editor:

We would like to express our great gratitude for you to give us the opportunity to revise our manuscript “A generalized spatial autoregressive neural network (GSARNN) method for three-dimensional spatial interpolation”. We have made a revision of the manuscript according to the comments and suggestions from you. These comments are all valuable and very helpful for improving our paper. We sincerely hope that our revisions would meet your requirements. Please don't hesitate to contact us if you have any problems about the response.

**Comment 1:** First, your code in FigShare does not include a license. If you do not include a license, despite what you state in the README file, the code is not "open-source"; it continues to be your property. Therefore, you should add a free software/open-source (FLOSS) license to the repository and mention it in the code. We recommend the GPLv3. You only need to include the file '<https://www.gnu.org/licenses/gpl-3.0.txt>' as LICENSE.txt with your code. Also, you can choose other options, for example, the GPLv2, Apache License, MIT License, etc.

**[Response]:** Thanks for your very helpful comment. According to your suggestion, we have adopted the GPLv3 license to our code and data in FigShare. A text file named “LICENSE.txt” obtained from '<https://www.gnu.org/licenses/gpl-3.0.txt>' has been upload to the original FigShare link in Section code and data availability.

**Comment 2:** Also, for your work, you use TensorFlow. This is not clear in the manuscript, and it is an important detail. Therefore, please, add more detail in the Methods section of the text about the specific software used and their versions.

**[Response]:** Thanks for your very helpful comment. We are sorry for neglecting this important detail. The GSARNN and SARNN models are implemented using TensorFlow-GPU 1.13.0 and Python 3.5.4. This information has been added in the section of experiment implementation (Section 3.1.2, Paragraph 2), which we consider it may be more suitable than adding it in Methods section.

*“The GSARNN and SARNN models are implemented using TensorFlow-GPU 1.13.0*

*and Python 3.5.4.”*
